# Supplementary material for: Investigation of Hg uptake and transport between paddy soil and rice seeds combining Hg isotopic composition and speciation
Source: Oxford University Press journal article supplement (doi:10.12952/journal.elementa.000087), 2016-01-01
Supplement: elementa_000087_s002.docx [file elementa_000087_s002.docx]

**Table S1.** **Sampling year and location**

| Location | Rice Seeds | | Paddy Soil | |
| --- | --- | --- | --- | --- |
| Sample name | year | Sample name | year |
| Dashuixi | DSX1-RS | 2013 | DSX1-PS | 2014 |
| DSX2-RS | DSX2-PS |
| DSX3-RS | DSX3-PS |
| DSX4-RS | DSX4-PS |
| DSX5-RS | NA |
| Meizixi | MZX1-RS | 2013 | MZX1-PS | 2014 |
| MZX2-RS | MZX2-PS |
| MZX3-RS | MZX3-PS |
| Baigoushu | BGS1-RS | 2013 | BGS1-PS | 2014 |
| BGS2-RS | BGS2-PS |
| Gouxi | GX1-RS | 2007 | NA | |
| GX2-RS | 2008 | NA | |
| GX3-RS1 | 2009 | GX3-PS1 | 2009 |
| NA | | GX3-PS2 |
| NA | | GX3-PS3 |
| GX4-RS1 | 2009 | GX4-PS1 | 2009 |
| NA | | GX4-PS2 |

“NA” means no sample available. RS: rice seeds, PS: paddy soil
