# Supplementary material for: Investigation of Hg uptake and transport between paddy soil and rice seeds combining Hg isotopic composition and speciation
Source: Oxford University Press journal article supplement (doi:10.12952/journal.elementa.000087), 2016-01-01
Supplement: elementa_000087_s003.docx [file elementa_000087_s003.docx]

**Table S2. Hg speciation in certified reference materials used for method validation (GC-ICP-MS)**

| **Sample name** | | **iHg** |  | **MeHg** | | |  | **THg** | | |
| --- | --- | --- | --- | --- | --- | --- | --- | --- | --- | --- |
| Obtained Value |  | Certified Value | Obtained Value | Recovery |  | Certified Value | Obtained Value | Recovery |
|  | | ng g-1 |  | ng g-1 | ng g-1 | % |  | ng g-1 | ng g-1 | % |
| Sediment | IAEA 405 | 831±11 |  | 5.5±0.2 | 6.8±0.9 | 120 |  | 805±40 | 839±11 | 104 |
| Fish | BCR 464 | 165±9 |  | 5120±170 | 4791±80 | 93 |  | 5240±100 | 4956±80 | 95 |

Results are expressed as mean value ±SD of triplicate sample analysis (n=3). SD means standard deviation. THg concentration is the sum of iHg and MeHg concentration. THg concentration in CRM sediments is the THg in the fraction of bulk sediments.
