# Supplementary material for: Investigation of Hg uptake and transport between paddy soil and rice seeds combining Hg isotopic composition and speciation
Source: Oxford University Press journal article supplement (doi:10.12952/journal.elementa.000087), 2016-01-01
Supplement: elementa_000087_s008.docx [file elementa_000087_s008.docx]

**Table S7. Hg isotopic composition in rice seeds samples**

| **Location** | **Sample name** | **204/198δ** | | | **202/198δ** | | | **201/198δ** | | | **200/198δ** | | | **199/198δ** | | | **∆201** | | | **∆200** | | | **∆199** | | |
| --- | --- | --- | --- | --- | --- | --- | --- | --- | --- | --- | --- | --- | --- | --- | --- | --- | --- | --- | --- | --- | --- | --- | --- | --- | --- |
| ‰ | | | ‰ | | | ‰ | | | ‰ | | | ‰ | | | ‰ | | | ‰ | | | ‰ | | |
| Dashuixi | DSX1-RS | -0.95 | ± | 0.23 | -0.62 | ± | 0.14 | -0.53 | ± | 0.14 | -0.29 | ± | 0.12 | -0.20 | ± | 0.13 | -0.06 | ± | 0.08 | 0.02 | ± | 0.08 | -0.05 | ± | 0.10 |
| DSX2-RS | -2.19 | ± | 0.50 | -1.40 | ± | 0.18 | -1.04 | ± | 0.16 | -0.68 | ± | 0.15 | -0.34 | ± | 0.13 | 0.02 | ± | 0.08 | 0.03 | ± | 0.08 | 0.02 | ± | 0.10 |
| DSX3-RS | -0.77 | ± | 0.23 | -0.48 | ± | 0.12 | -0.43 | ± | 0.12 | -0.28 | ± | 0.12 | -0.19 | ± | 0.13 | -0.07 | ± | 0.08 | -0.04 | ± | 0.08 | -0.07 | ± | 0.10 |
| DSX4-RS | -3.25 | ± | 0.39 | -2.16 | ± | 0.22 | -1.65 | ± | 0.16 | -1.07 | ± | 0.12 | -0.55 | ± | 0.13 | -0.02 | ± | 0.08 | 0.02 | ± | 0.08 | 0.00 | ± | 0.10 |
| DSX5-RS | -2.14 | ± | 0.23 | -1.43 | ± | 0.14 | -1.17 | ± | 0.12 | -0.73 | ± | 0.12 | -0.47 | ± | 0.13 | -0.09 | ± | 0.08 | -0.02 | ± | 0.08 | -0.11 | ± | 0.10 |
| Meizixi | MZX1-RS | -4.19 | ± | 0.23 | -2.80 | ± | 0.12 | -2.13 | ± | 0.22 | -1.38 | ± | 0.12 | -0.71 | ± | 0.13 | -0.02 | ± | 0.16 | 0.03 | ± | 0.08 | 0.00 | ± | 0.10 |
| MZX2-RS | -4.11 | ± | 0.23 | -2.76 | ± | 0.12 | -2.08 | ± | 0.12 | -1.40 | ± | 0.12 | -0.70 | ± | 0.13 | 0.01 | ± | 0.08 | -0.02 | ± | 0.08 | 0.00 | ± | 0.10 |
| MZX3-RS | -1.68 | ± | 0.23 | -1.08 | ± | 0.12 | -0.84 | ± | 0.12 | -0.51 | ± | 0.12 | -0.32 | ± | 0.13 | -0.02 | ± | 0.08 | 0.03 | ± | 0.08 | -0.05 | ± | 0.10 |
| Baigoushu | BGS1-RS | -4.66 | ± | 0.86 | -3.11 | ± | 0.55 | -2.34 | ± | 0.58 | -1.56 | ± | 0.36 | -0.79 | ± | 0.13 | 0.00 | ± | 0.17 | 0.00 | ± | 0.08 | 0.00 | ± | 0.10 |
| BGS2-RS | -5.53 | ± | 0.54 | -3.74 | ± | 0.28 | -2.86 | ± | 0.26 | -1.86 | ± | 0.18 | -1.00 | ± | 0.01 | -0.04 | ± | 0.08 | 0.02 | ± | 0.08 | -0.05 | ± | 0.10 |
| Gouxi | GX1-RS | -5.21 | ± | 0.23 | -3.48 | ± | 0.12 | -2.67 | ± | 0.12 | -1.76 | ± | 0.12 | -0.83 | ± | 0.13 | -0.04 | ± | 0.08 | -0.01 | ± | 0.08 | 0.05 | ± | 0.10 |
| GX2-RS | -2.30 | ± | 0.23 | -1.49 | ± | 0.12 | -1.13 | ± | 0.12 | -0.78 | ± | 0.12 | -0.31 | ± | 0.13 | -0.01 | ± | 0.08 | -0.04 | ± | 0.08 | 0.06 | ± | 0.10 |
| GX3-RS1 | -5.94 | ± | 0.23 | -3.54 | ± | 0.12 | -2.62 | ± | 0.12 | -1.73 | ± | 0.12 | -0.89 | ± | 0.13 | 0.04 | ± | 0.08 | 0.05 | ± | 0.08 | 0.00 | ± | 0.10 |
| GX4-RS1 | -3.79 | ± | 0.23 | -2.40 | ± | 0.12 | -1.81 | ± | 0.12 | -1.21 | ± | 0.12 | -0.54 | ± | 0.13 | -0.01 | ± | 0.08 | 0.00 | ± | 0.08 | 0.06 | ± | 0.10 |

Results expressed as mean value ± 2SD. SD means standard deviation. RS: rice seeds.
