# Supplementary material for: Investigation of Hg uptake and transport between paddy soil and rice seeds combining Hg isotopic composition and speciation
Source: Oxford University Press journal article supplement (doi:10.12952/journal.elementa.000087), 2016-01-01
Supplement: elementa_000087_s011.docx [file elementa_000087_s011.docx]

**Figure S3.** **Hg isotopic compositions in rice seeds and paddy soil samples.**

**a)** Hg even isotopes mass dependent fractionation; **b)** Hg odd isotopes mass independent fractionation. RS: rice seeds. PS: paddy soil.
